# Supplementary material for: The Association of ADAMTS7 Gene Polymorphisms with the Risk of Coronary Artery Disease Occurrence and Cardiovascular Survival in the Polish Population: A Case-Control and a Prospective Cohort Study
Source: MDPI journal article supplement (doi:10.3390/ijms25042274), 2024-02-14
Supplement: s1 [file s1]

**Table S1.** Synergistic effect of the *ADAMTS7* gene polymorphisms and elevated parameters of lipid metabolism.

| rs3825807<br>A allele | TC $\geq$ 5<br>mmol/L  | CAD<br>(n =212) | Controls<br>(n = 233) | OR (95% CI)        |
|-----------------------|------------------------|-----------------|-----------------------|--------------------|
| 1                     | 1                      | 130             | 81                    | 3.39 (1.46 – 7.85) |
| 1                     | 0                      | 54              | 103                   | 1.11 (0.47 – 2.61) |
| 0                     | 1                      | 19              | 30                    | 1.34 (0.50 – 3.56) |
| 0                     | 0                      | 9               | 19                    | 1                  |
| rs3825807<br>A allele | LDL $\geq$ 3<br>mmol/L | CAD<br>(n =210) | Controls<br>(n = 233) | OR (95% CI)        |
| 1                     | 1                      | 147             | 86                    | 3.63 (1.50 – 8.77) |
| 1                     | 0                      | 35              | 98                    | 0.76 (0.30 – 1.91) |
| 0                     | 1                      | 20              | 32                    | 1.33 (0.48 – 3.64) |
| 0                     | 0                      | 8               | 17                    | 1                  |
| rs1994016<br>C allele | TC $\geq$ 5<br>mmol/L  | CAD<br>(n =211) | Controls<br>(n = 232) | OR (95% CI)        |
| 1                     | 1                      | 131             | 81                    | 3.05 (1.30 – 7.18) |
| 1                     | 0                      | 53              | 104                   | 0.96 (0.40 – 2.30) |
| 0                     | 1                      | 18              | 30                    | 1.13 (0.42 – 3.07) |
| 0                     | 0                      | 9               | 17                    | 1                  |
| rs7173743<br>T allele | TC $\geq$ 5<br>mmol/L  | CAD<br>(n =212) | Controls<br>(n = 233) | OR (95% CI)        |
| 1                     | 1                      | 125             | 77                    | 2.84 (1.32 – 6.10) |
| 1                     | 0                      | 51              | 101                   | 0.88 (0.40 – 1.98) |
| 0                     | 1                      | 24              | 34                    | 1.24 (0.51 – 2.98) |
| 0                     | 0                      | 12              | 21                    | 1                  |

TC – total cholesterol, LDL – low-density lipoprotein, OR – Odds Ratio, CAD – coronary artery disease (patient group).
